1 **The effects of high-altitude windborne migration on survival, oviposition and blood-feeding of the**  
2 **African malaria mosquito, *Anopheles gambiae* s.l.**

3 Sanogo ZL<sup>a</sup>, Yaro AS<sup>a</sup>, Dao A<sup>a</sup>, Diallo M<sup>a</sup>, Yossi O<sup>a</sup>, Samaké D<sup>a</sup>, Krajacich BJ<sup>b</sup>, Faiman R<sup>b</sup> and Lehmann T<sup>a</sup>

4

5 <sup>a</sup> Malaria Research and Training Center (MRTC) / Faculty of Medicine, Pharmacy and Odonto-  
6 stomatology, Bamako, Mali

7 <sup>b</sup> Laboratory of Malaria and Vector Research, NIAID, NIH. Rockville, MD, USA

8

9 **Corresponding Author:** Tovi Lehmann

10 Laboratory of Malaria and Vector Research, NIAID, NIH

11 12735 Twinbrook Parkway, Room 3W-13-F

12 Rockville MD 20852

13 Cell : 240 408 9820

14 <https://www.niaid.nih.gov/research/tovi-lehmann-phd>

15 NIH network: <https://www.niaid.nih.gov/research/mwmdvppia>

16

17 **Abstract**

18 Recent results of high-altitude windborne mosquito migration raised questions about the viability of  
19 these mosquitoes despite ample evidence that many insect species, including other dipterans have been  
20 known to migrate regularly over tens or hundreds of kilometers on high-altitude winds and retain their  
21 viability. To address these concerns, we subjected wild *An. gambiae* s.l. mosquitoes to a high-altitude  
22 survival assay, followed by oviposition (egg laying) and blood feeding assays. Despite carrying out the  
23 survival assay under exceptionally harsh conditions that probably provide the lowest survival potential  
24 following high altitude flight, a high proportion of the mosquitoes survived for six and even eleven hours  
25 assay durations at 120-250m altitudes. Minimal differences in egg laying success were noted between  
26 mosquitoes exposed to high altitude survival assay and those kept near the ground. Similarly, minimal  
27 differences were found in the female's ability to take an additional blood meal after oviposition  
28 between these groups. We conclude that similar to other high-altitude migrating insects, mosquitoes  
29 are able to withstand extended high-altitude flight and subsequently reproduce and transmit pathogens  
30 by blood feeding on new hosts.

31 **Keywords:** altitude, blood-feeding, egg-laying, malaria, migration, survival, windborne-dispersal

32

33 **Background**

34 The recent report of windborne migrating mosquitoes at high altitude (Huestis *et al.*, 2019) marks a  
35 paradigm shift in our understanding of mosquito and pathogen dispersal. Many insect species, ranging  
36 in size from large locusts (Orthoptera; Acrididae), hoverflies (Diptera; Syrphidae), blackflies (Diptera;

37 Simuliidae), frit flies (Diptera; Chloropidae), wheat midges (Diptera; Cecidomyiidae), and even minute  
38 *Culicoides* biting midges (Diptera; Ceratopogonidae) and aphids (Hemiptera; Aphididae) have been known  
39 to exploit high-altitude winds to migrate over tens or hundreds of kilometers (Johnson *et al.*, 1962;  
40 Johnson, 1969; Rainey, 1973; Sellers, 1980; Pedgley *et al.*, 1995; Reynolds *et al.*, 2006; Sanders *et al.*,  
41 2011; Miao *et al.*, 2013; Wotton *et al.*, 2019). However, despite anecdotal observations in support of  
42 similar migratory behavior (Glick, 1939; Garrett-Jones, 1962; Reynolds *et al.*, 1996; Johansen *et al.*,  
43 2003), mosquitoes and especially malaria vectors were considered to migrate exclusively in the flight  
44 boundary layer, typically well below 10m above ground level (agl) where the mosquito's own flight is the  
45 key factor determining its speed and direction rather than the wind (Snow & Wilkes, 1972; Gillies &  
46 Wilkes, 1976; Snow, 1982). Because high-altitude windborne migration in mosquitoes has long been  
47 considered accidental and thus of negligible significance (Service, 1997) some vector biologists doubt  
48 the viability of the mosquitoes collected in altitude.

49 In other high-altitude windborne migrant insects, questions about viability post-migration have been  
50 settled long ago by studies comparing survival and reproduction in a live collection of insects, including  
51 small Diptera (using non-sticky nets, at altitudes similar to our panels) with those captured on the  
52 ground or by simulated long flights (Taylor, 1960; Cockbain, 1961; Mcanelly & Rankin, 1986). After  
53 finding similar survival and reproductive success, Taylor (1960) concluded that "This seems to establish  
54 the viability of high-level migrants beyond reasonable doubt." The view that insect flight at high altitude  
55 is in itself harmful, and insects are subject to physiological stresses not found in flight at low altitude,  
56 has become rare (Johnson, 1969), at least among agricultural entomologists. This is partly due to small  
57 pest insects evidently migrating over very long distances and infest crops on landing, such as the brown  
58 planthopper (*Nilaparvata lugens*) which migrates about 700-1000 km from eastern China to Japan every  
59 year (Rosenberg & Magor, 1987). Evidence for the benefit of long-range windborne migration for the  
60 insect migrants has also recently come to light based on four fold amplification of the spring migrants  
61 when compared with their returning offspring (Chapman *et al.*, 2012).

62 Considering mosquitoes, specimens caught by aerial netting at altitude in China and India (Ming *et al.*,  
63 1993; Reynolds *et al.*, 1996) were alive and active upon capture. Based on the distinct composition of  
64 the mosquito species, sexes, and female gonotrophic states at altitude compared with on the ground,  
65 Huestis *et al.* (2019) inferred that mosquitoes, like other insects (Drake & Reynolds, 2012), deliberately  
66 ascend into the winds at altitude rather than being inadvertently "forced upwards" by winds. For  
67 example, collections 100-290 m agl in Mali were dominated by secondary malaria vectors, e.g., *An.*  
68 *squamosus* and *An. pharoensis*, whereas, on the ground using indoor collections, outdoor clay-pot traps,  
69 and larval collections in the vicinity of the same villages, >90% of *Anopheles* captured were *An. gambiae*  
70 s.l.. The difference among *An. coluzzii* and *An. arabiensis* that share similar larval, biting, and resting sites  
71 (Toure *et al.*, 1996; Lemasson *et al.*, 1997; Lehmann & Diabate, 2008; Dao *et al.*, 2014) and are less  
72 affected by sampling bias, better demonstrate species-specific differences in high altitude flight  
73 behavior because *An. arabiensis* has not been found at altitude. Additionally, aerial density of  
74 mosquitoes was higher when ground-level wind was slower (Huestis *et al.*, 2019; Florio *et al.*, 2020:  
75 PREPRINT).

76 In addition to the exertion of sustained flight, presumably over several hours (Kaufmann & Briegel,  
77 2004; Huestis *et al.*, 2019; Faiman *et al.*, 2020: PREPRINT), nightly high altitude flight exposes  
78 mosquitoes to a combination of different temperatures, humidity (RH) and wind speeds than those  
79 conditions on the ground. Given the low sampling efficiency of mosquitoes in high altitude, evaluating  
80 the effects of these factors on their viability is not straightforward. In a preliminary analysis described in  
81 Huestis *et al.* (2019), survival of *Anopheles gambiae* s.l. collected indoors and placed individually, in  
82 modified 50 ml tubes (both ends covered with netting, Fig S1) that were raised using the helium balloon

83 to 120-190 m agl and subjected to wind passing through the tubes for 13 hours was not statistically  
84 different from that of mosquitoes kept near the ground (altitude: 58% N=26 vs. ground: 71%, N=17;  
85  $P>0.38$ ,  $\chi^2_1=0.75$ , Fig. 1a). Given that the mosquitoes at altitude were unable to “ride the wind” but were  
86 tumbling against and abraded by the hard stretched net all night long, this assay provides the lowest  
87 survival limit of mosquitoes at altitude. Nonetheless, without a better alternative, here we utilized this  
88 conservative assay to measure the effect of altitude, duration of “flight”, and wind speed on the  
89 mosquito’s survival. Additionally, we evaluate her post-flight capacity to lay eggs, and her ability to take  
90 another blood meal. Our new results, based on a larger sample size, demonstrate that mosquito  
91 migrants at high altitude can indeed survive, lay eggs, and thereafter take a new blood meal, thus  
92 enabling a new transmission encounter with the host after their migration.

## 93 **Methods**

### 94 *Study location and mosquitoes*

95 This study was performed from October to November 2019 in Thierola, Mali (13°39′30.96″ N,  
96 7°12′52.92″ W), a Sahelian village described previously (Lehmann *et al.*, 2010; Dao *et al.*, 2014). The  
97 area’s single wet season occurs between June and October (~550 mm). Rainfall is negligible (<50 mm)  
98 from November until May. By December, water is available only in deep wells.

99 Wild *An. gambiae* s.l. females were collected in human dwellings between 08:00 to 10:00 in Thierola and  
100 the neighboring villages (<7 km away) using mouth aspirators. Female mosquitoes were provided with  
101 10% sucrose solution in cages covered with wet towels, which were kept in a typical village house used  
102 as a field insectary (without climate control). Blood-fed and semi-gravid female mosquitoes were  
103 housed in the field insectary until they reached the gravid state (up to 2 days) and could be subjected to  
104 the high-altitude survival assay. Females had access to 10% sugar solution until 2 hours before the  
105 survival assay.

### 106 *The high-altitude survival assay*

107 Fully gravid females were randomly assigned to different altitude exposure treatments varying between  
108 a) 1 to 290 m agl, b) assay duration of 6, 11, or 13 hours, and c) high vs. low air flow. Each female was  
109 individually placed in 5 cm long and 3 cm diameter tubes made by cutting 50 ml Falcon tubes (Fig. S1).  
110 To control the air flow through the tubes, the openings were covered with net (hole diameter= 1.5mm)  
111 or cloth (hole diameter= 0.2mm, Fig. S1). Groups of mosquitoes were launched after sunset and  
112 retrieved around sunrise, except the six hour duration group, which were either launched and retrieved  
113 between 18:00 and midnight or between midnight and 06:00 as previously described (Huestis *et al.*,  
114 2019). Five to ten tubes containing mosquitoes were mounted on the rope using adhesive tape (Fig. S1)  
115 in set altitudes 1, 120, 180 (160 and 190 pooled) and 250 (220-280 pooled) m from the ground.  
116 Mosquitoes mounted 1 m from the ground and those kept in insectary were used as controls. Upon  
117 retrieval, typically around 07:00, mosquitoes were examined for mobility and recorded as live (mobile)  
118 or dead (immobile) within one hour after retrieval. Live mosquitoes were further subjected to  
119 oviposition assay.

### 120 *Oviposition assay*

121 Surviving mosquitoes were individually transferred into 50 ml tube with 5 ml water for oviposition on  
122 the afternoon of the same day they completed the survival assay. Every morning, during four  
123 consecutive days, each tube was inspected for eggs. The number of eggs laid was estimated and their  
124 hatching was noted in the following days. Females that died during the oviposition assay were scored to  
125 produce zero eggs. Females that did not lay eggs by the end of the oviposition assay were killed and

126 immediately dissected and their spermatheca examined to determine their insemination status. Their  
127 ovaries were also examined to determine if they were gravid and the number of developed eggs in their  
128 abdomen were counted. Due to logistical constraints, not all females that did not lay eggs were  
129 dissected.

### 130 *Blood feeding assay*

131 Females which laid eggs were subjected to a blood feeding assay the following night. They were  
132 provided with water only (no sugar solution) until 22:00, when they were placed, in a pint size cage,  
133 against a chicken's breast (under the wing) of an immobilized chicken for 20 min in accord with animal  
134 care guidelines (F20-00465 MRTC). Immediately afterwards, females were scored as fully fed, partly fed,  
135 or unfed.

136 At the end of the blood feeding assay or after female mosquitoes died naturally (or accidentally), they  
137 were preserved in 80% ethanol. The sibling species of the *Anopheles gambiae* complex were identified  
138 as previously described (Fanello *et al.*, 2002).

### 139 *Statistical analysis*

140 Mosquito survival, oviposition, and subsequent blood feeding are dichotomous variables. Their  
141 corresponding fractions in each category was computed and plotted. To increase group size and the  
142 power of the statistical analyses, adjacent altitudinal panels were pooled together, e.g., 160m and 190m  
143 were pooled together in a class of 175m and 220-280m were similarly pooled into 250m class. Likewise,  
144 we pooled groups of mosquitoes that were exposed to altitude between 18:00 and midnight with those  
145 that were exposed from midnight to 06:00 in the 6-hour duration group. Contingency tables and log-  
146 likelihood tests were used to examine the relationship of each treatment separately on the dependent  
147 variables (survival, oviposition, and blood feeding), including stratification across an additional variable  
148 using Cochran-Mantel-Haenszel test (SAS Inc., 2012). Multivariate analysis of the survival rate of  
149 mosquitoes was carried out using Proc Mixed (SAS Inc., 2012) on the fraction of surviving mosquitos per  
150 treatment (combination of altitude, duration, cover type and date). Date was introduced in the model as  
151 a random variable because it captures variation in temperature, wind speed, and RH (below). To  
152 evaluate the variation among species, the analysis was repeated with and without the species effect.  
153 Finally, the nightly weather parameters were introduced into the model. Multivariate analyses of  
154 oviposition (egg laying) and blood feeding were carried out using logistic regression carried out by Proc  
155 Logistic (SAS Inc., 2012). Weather data including hourly temperature, RH, wind speed, and direction at  
156 2m and 180m agl were extracted from atmospheric reanalyses of the global climate ERA5 (Copernicus  
157 Climate Change Service, 2018) as previously described (Huestis *et al.*, 2019). Nightly means of each  
158 parameter from 18:00 to 07:00 (Fig. S2) at corresponding experimental nights were used as predictors of  
159 mosquito survival (Table 1).

160

## 161 **Results & Discussion**

### 162 *Survival after high altitude exposure assay*

163 Over nine nights, a total of 519 wild *An. gambiae* s.l. females were subjected to the survival assay (Fig.  
164 S1, Methods) and maintained for 6 to 13 hours in altitudes ranging from 1 to 280 m agl (Table 1).  
165 Because wind speed increases with altitude and the mosquitoes remain confined in their tubes against  
166 the wind, rather than fly almost stationary in relation to the parcel of air they would be carried by, we

167 predicted that most stressful conditions occur in the longest assay at the highest altitude in tubes  
168 covered by net vs. cloth.

169 Overall, the difference in survival due to altitude varied little between ground (91%, n=105) and 120m  
170 (84%, n=188), but was large at higher altitudes (160-280m: 25%, n=225, Table 1). As expected, survival  
171 fell with exposure time: 92% (n=144), 56% (n=135) and 39% (n=240) for 6, 11, and 13 hours,  
172 respectively. Additionally, survival at altitude increased if the openings of the tubes were covered by a  
173 cloth of higher wind resistance (0.2mm hole sizes: 78%, n=60) compared with tubes covered by net of  
174 lower wind resistance (1.5mm hole size: 56%, n=411). However, because the experiments were not  
175 balanced, the similar survival rate between the ground and 120 m altitude compared with the lower  
176 survival at 160--280m, probably was affected by the inclusion of short-duration exposure (6 hours and  
177 to a lesser extent 11 hours) at 120m agl (Fig 1). To parse these effects, we analyzed them simultaneously  
178 using ANCOVA with random variable (date) and fixed effects of duration, altitude, and net type. As  
179 expected, the results revealed that altitude, assay duration, and wind-resistance of the tube cover had  
180 significant effect on mosquito survival ( $P < 0.027$ , Table 2), whereas the variance among dates was non-  
181 significant ( $P < 0.067$ , Table 2). On average, 100m increment of altitude was associated with 25%  
182 reduction in survival and an additional hour of the assay reduces survival by 6% (Table 1). Using higher  
183 wind resistant cover (cloth) over the tube's opening instead of lower wind-resistant netting increased  
184 survival by 22% (Table 2). The species composition at the time of the assay was dominated by *A. coluzzii*  
185 (76%), followed by *A. arabiensis* (14%) and *A. gambiae* s.s. (10%, N=344 mosquitoes). The variation  
186 among the species in survival was not significant ( $P > 0.35$ , Table 2) and the other effects remained  
187 unchanged, indicating that the three Sahelian species responded similarly to the assay.

188 Under this conservative survival assay, females of *A. coluzzii*, *A. gambiae* and *A. arabiensis* can survive  
189 >13 hours at high altitude. Highest survival (>90%) was shown when exposure was 6 hours or up to 11  
190 hours at 120m when the wind force was attenuated by a cloth (pores of 0.2mm diameter) instead of a  
191 net (pores of 1.5mm diameter). Mean nightly windspeed at 150m agl (5--7m/s) was >5 fold greater than  
192 at 2m agl (Fig. S2), and >7 fold at 250m agl (7--9m/s, not shown), explaining the harsh conditions  
193 mosquitoes experience in tubes covered by nets. The small pore size of the cloth allows rapid  
194 equilibration of temperature and RH with the surroundings, so the protective effect of the cloth  
195 operates solely by wind attenuation. This is also corroborated by the negative effect of altitude on  
196 survival because wind speed increases with altitude. The survival assay is extremely harsh because the  
197 mosquito is pummeled by strong wind against the rough surface of the stretched net, probably resulting  
198 in desiccation and physical damage that increase mortality. This effect does not occur in natural high-  
199 altitude flight when the mosquito is more or less stationary with respect to the air parcel it is carried in.  
200 Additionally, the 2019 experiments were performed in the transition between the wet (October) and the  
201 dry season (November) when nightly relative humidity drops from 80% to 30% (Fig S2) and mean nightly  
202 windspeed at altitude increased during November to 9-10 m/s compared with 5-6 m/s in August-  
203 September (Fig. S2), during peak migration (Huestis et al. 2019). *Importantly, even under these*  
204 *exaggerated, taxing conditions, 70% and 30% of the mosquitoes survived for 11 hours at 120 or 250 m*  
205 *agl, respectively as opposed to 90% at ground level.*

#### 206 *Oviposition of mosquitoes that survived high-altitude exposure assay*

207 To assess if gravid *A. gambiae* s.l. mosquitoes that withstood exposure to high altitude (above) are  
208 capable of laying eggs, they were transferred to individual 50 ml tubes and provided with water for  
209 oviposition. The water was examined daily for eggs during four days. Mosquitoes that did not lay eggs  
210 were dissected to determine insemination status. Overall, 46% of the 267 gravid females subjected to  
211 the assay laid eggs. However, 12% (n=10) of 83 females that did not lay eggs and were dissected had no

212 sperm and therefore, could not lay eggs, thus indicating that overall oviposition rate among inseminated  
213 females was near 60% (the average egg batch size was 108 (n=121, 95% CL=97-119). During October  
214 November oviposition rate and egg batch size of *A. coluzzii* are reduced (Yaro *et al.*, 2012), and the  
215 observed values are similar to those observed previously during this time.

216 The effects of altitude, assay duration, and tube cover material on the likelihood of laying eggs were  
217 weak (Table 2, Fig. 1d and Fig. 1e). The effect of altitude was not significant ( $P>0.2$ , Table 2, Fig. 1e). The  
218 effect of the assay duration was significant ( $P<0.03$ , Table 2), but the 95% confidence limits of the  
219 highest odds ratio (6 vs. 13 hours) included 1 (Fig. 1e), questioning the significance of the effect. The  
220 effect of tube cover was statistically significant ( $P<0.039$ , Table 2) and amounted for 32% higher egg  
221 laying probability compared with those housed in a net covered tube (Table 2). Considering egg batch  
222 size of females that laid eggs (excluding zeros, N=121), the effects of altitude, assay duration, and tube  
223 cover material were all not significant (Table 2). For example the mean egg batch size (and 95%CI) of  
224 females kept on the ground, at 120m, and 200m agl were 110.5 (92.9-128.0, N=39), 108.9 (93.7-122.5,  
225 N=66), and 101.7 (62.4-141.0, N=16), respectively and the largest egg batch size (340 eggs) was laid by a  
226 female kept at 200 m agl.

#### 227 *Blood feeding of mosquitoes that survived high-altitude exposure assay*

228 To assess if gravid *A. gambiae s.l.* mosquitoes that withstood exposure to high altitude (above) are  
229 capable of taking a blood meal after laying eggs, females were subjected to a blood feeding assay (see  
230 Methods). Overall, 56% of the 66 females subjected to the assay took a blood meal. Differences  
231 between treatments were minimal and statistically not significant (Table 2. Fig. 1f). The rates of blood  
232 feeding on the ground vs. at altitude were 65% and 50%, respectively; at assay times of 6, 11, and 13  
233 hours were 52%, 50%, and 73%, respectively; and under net vs. cloth were 58% and 50% respectively.

234

#### 235 **Conclusions**

236 These experiments extend previous results obtained in 2015 (Huestis *et al.* 2019). In addition to larger  
237 sample size for the survival analysis, surviving mosquitoes were subjected to an oviposition assay  
238 followed by a blood feeding assay to evaluate the capacity of anopheline mosquitoes to survive the  
239 exposure to high altitude, and subsequently to lay eggs and take, at least, one additional blood meal.  
240 Despite carrying out these experiments during the transition from the wet to the dry season (October--  
241 November), after peak migration (Huestis *et al.*, 2019), when RH decreases and wind speed increases –  
242 conditions that reduce mosquito survival (Clements, 1992; Huestis & Lehmann, 2014; Arcaz *et al.*, 2016)  
243 and despite using an exceptionally harsh survival assay that arguably provides the lowest limit of survival  
244 following high altitude flight, high proportion of the mosquitoes survived for 11 hours assay duration.  
245 Furthermore, minimal differences in egg laying and in their ability to take another blood meal were  
246 found between mosquitoes exposed to high altitudes overnight and those near the ground. We  
247 conclude that similar to all other insect species that have been evaluated (Taylor, 1960; Cockbain, 1961;  
248 Mcanelly & Rankin, 1986) mosquitoes are able to withstand high altitude flight and subsequently  
249 reproduce and transmit pathogens by blood feeding on new hosts.

250

251

252

253 **Fig. 1.** The effect of altitude and assay duration on survival of *A. gambiae* s.l. mosquitoes. (a) The  
254 survival rates in July and October 2015 for 13 hours assay duration described in Huestis et al. (2019) and  
255 Introduction (above); dot size signifies sample size per experimental date (lines connect the mean  
256 values). (b) The survival rate in late October-November 2019 over different assay durations (pooling net  
257 and cloth covers of the tubes). (c) The survival rate (2019) over different assay times based on least  
258 square means (net only). Inset: The difference in survival between tubes covered with net (blue) or  
259 cloth (red) for the means of the 11-13 hours exposure assays. d) Oviposition rate (2019) among survivors  
260 from different altitudes, assay durations and net covers (N vs. C). e) Odds ratios estimates (dot) and 95%  
261 CI of the probabilities to lay eggs between treatments denoted on the Y axis based. Note: if the 95% CI  
262 intersects 1, the effect is not statistically significant. f) Odds ratios estimates (dot) and 95% CI of the  
263 probability to blood feeding (after oviposition, see e, above).

264

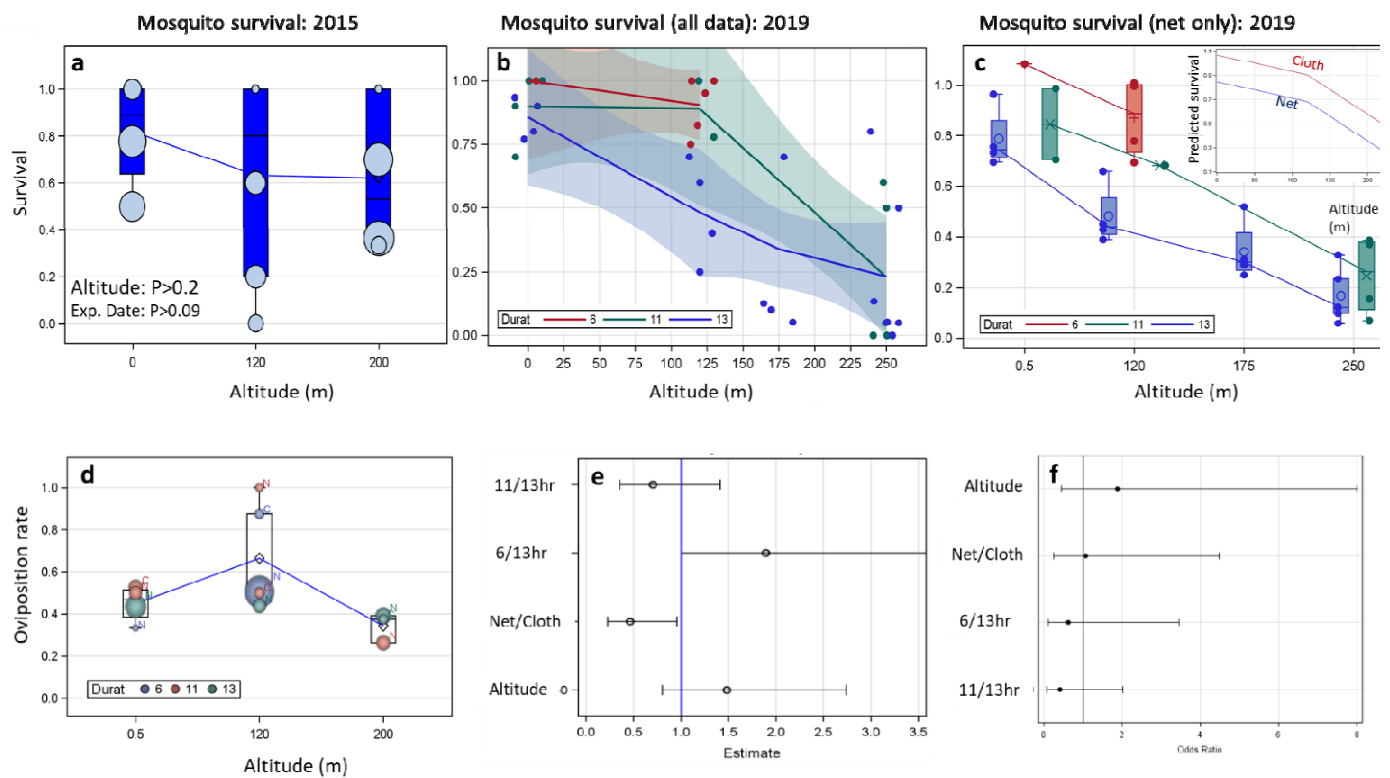

265

266

267

268 **Table 1.** Distribution of *An. gambiae* s.l. across treatments and their survival rate

| Altitude | Duration (h) | Cover | N   | Survival (%) |
|----------|--------------|-------|-----|--------------|
| Ground   | 6            | Net   | 7   | 100          |
| Ground   | 6            | Cloth | ND  | ND           |
| Ground   | 11           | Net   | 20  | 85           |
| Ground   | 11           | Cloth | 20  | 95           |
| Ground   | 13           | Net   | 58  | 85           |
| Ground   | 13           | Cloth | ND  | ND           |
| 120m     | 6            | Net   | 127 | 91           |
| 120m     | 6            | Cloth | 10  | 100          |
| 120m     | 11           | Net   | 9   | 78           |
| 120m     | 11           | Cloth | 10  | 100          |
| 120m     | 13           | Net   | 33  | 49           |
| 120m     | 13           | Cloth | ND  | ND           |
| 175m     | 13           | Net   | 65  | 19           |
| 250m     | 11           | Net   | 66  | 35           |
| 250m     | 11           | Cloth | 10  | 0            |
| 250m     | 13           | Net   | 74  | 12           |
| 250m     | 13           | Cloth | 10  | 80           |

269

270



271

272 **Table 2.** Summary of the results of the statistical models used to analyze survival, oviposition success,  
 273 and blood feeding success.

| Dep. Variable: Model<br>(N) -2LL(Res)/AIC <sup>a</sup>                                                          | Effect <sup>b</sup> | F <sub>n,d</sub> /Z/W <sup>c</sup> | P      | Estimate <sup>d</sup> |
|-----------------------------------------------------------------------------------------------------------------|---------------------|------------------------------------|--------|-----------------------|
| <b>Survival:</b> Mixed ANCOVA model (519)<br>8.2/12.2                                                           | Altitude (m)        | 67.2 <sub>1:26</sub>               | 0.0001 | -0.0025/m             |
|                                                                                                                 | Duration (h)        | 16.0 <sub>1:26</sub>               | 0.0005 | -0.058/hr             |
|                                                                                                                 | Wind protection     | 6.1 <sub>1:26</sub>                | 0.021  | -0.22 net vs. cloth   |
|                                                                                                                 | Date [R]            | 1.5                                | 0.067  | 0.21                  |
|                                                                                                                 | Residual [R]        | 3.7                                | 0.0001 | 0.28                  |
|                                                                                                                 | Intercept           | 100 <sub>1:8</sub>                 | 0.0001 | 1.77                  |
| <b>Survival</b> (with species): Mixed ANCOVA model (344)<br>53.9/57.9                                           | Altitude (m)        | 47.0 <sub>1:68</sub>               | 0.0001 | -0.0026/m             |
|                                                                                                                 | Duration (h)        | 1.4 <sub>1:68</sub>                | 0.0001 | -0.071/hr             |
|                                                                                                                 | Wind protection     | 6.7 <sub>1:68</sub>                | 0.012  | -0.23 net vs. cloth   |
|                                                                                                                 | <b>Species</b>      | 1.1 <sub>2:68</sub>                | 0.35   | 0.065 S vs. M         |
|                                                                                                                 | Date [R]            | 1.6                                | 0.057  | 0.38                  |
|                                                                                                                 | Residual [R]        | 5.8                                | 0.0001 | 0.07                  |
| <b>Survival</b> (with weather): Mixed ANCOVA model (519)<br>15.6/17.6                                           | Altitude (m)        | 66.4 <sub>1:32</sub>               | 0.0001 | -0.0025               |
|                                                                                                                 | Duration (h)        | 21.8 <sub>1:32</sub>               | 0.0001 | -0.049                |
|                                                                                                                 | Wind cover          | 9.0 <sub>1:32</sub>                | 0.0053 | -0.278                |
|                                                                                                                 | RH                  | 6.7 <sub>1:32</sub>                | 0.0145 | 0.0037                |
|                                                                                                                 | Wind speed          | 18.6 <sub>1:32</sub>               | 0.0001 | -0.0762               |
|                                                                                                                 | Residual [R]        | 4                                  | 0.0001 | 0.029                 |
| <b>Oviposition:</b> Logistic Regression (267)<br>361/368.5 Global<br>Beta=0: Wald=9.1 <sub>3</sub> ,<br>P=0.059 | Altitude (m)        | 1.1 <sub>1</sub>                   | 0.29   | -0.0022 (0.99)        |
|                                                                                                                 | Duration (h)        | 4.7 <sub>1</sub>                   | 0.029  | -0.10 (0.90)          |
|                                                                                                                 | Wind protection     | 2.5 <sub>1</sub>                   | 0.11   | -0.27 (0.77)          |
|                                                                                                                 | Intercept           | 3.9 <sub>1</sub>                   | 0.048  | 1.21 (3.34)           |
| <b>Egg batch size:</b> GLM ANCOVA (121), Global model: F <sub>3:117</sub> =1.8<br>P=0.16, R <sup>2</sup> =0.043 | Altitude (m)        | 0.3 <sub>1:116</sub>               | 0.58   | 0.05                  |
|                                                                                                                 | Duration (h)        | 2.75 <sub>1:116</sub>              | 0.10   | 3.37                  |
|                                                                                                                 | Wind protection     | 2.65 <sub>1</sub>                  | 0.11   | 21.4                  |
|                                                                                                                 | Intercept           | 3.76 <sub>1</sub>                  | 0.055  | 54.4                  |
| <b>Blood feeding:</b> Logistic Regression (66)<br>88.4/97.3<br>Global Beta=0:<br>Wald=2.03, P=0.73              | Altitude (m)        | 0.50 <sub>1</sub>                  | 0.48   | -0.003 (0.99)         |
|                                                                                                                 | Duration (h)        | 0.12 <sub>1</sub>                  | 0.73   | 0.041 (1.04)          |
|                                                                                                                 | Wind protection     | 0.53 <sub>1</sub>                  | 0.46   | 0.23 (1.26)           |
|                                                                                                                 | Intercept           | 0.002 <sub>1</sub>                 | 0.48   | 0.06 (1.06)           |

274

275 <sup>a</sup> Dependent variable and the statistical model used in the analysis; N denotes the number of  
 276 mosquitoes used in the model. The residual -2 log likelihood value is followed by the Akaike information  
 277 criterion (AIC). For logistic regression analyses, we provide the global Wald chi square test and P value  
 278 testing the null hypothesis that all effects are zero. For GLM, we list global model test and R<sup>2</sup> values.

279 <sup>b</sup> Independent variables, with random variable followed by [R]. "Wind protection" refers to covering  
 280 the tube with net vs. cloth (see text).

281 <sup>c</sup> F statistics with their corresponding numerator (n) and denominator (d) df for fixed effects and Z  
 282 statistics for random variables. The Wald  $\chi^2$  test For logistic regression is reported.

283 <sup>d</sup> Estimate for categorical variables compare the two categories, e.g., the estimated survival of *A.*  
284 *gambiae* s.s. (S) was higher by 6.5% than that of *A. coluzzii* (M), although the difference was not  
285 significant.

## 286 References

287 Arcaz, A.C., Huestis, D.L., Dao, A., Yaro, A.S., Diallo, M., Andersen, J., *et al.* (2016) Desiccation Tolerance  
288 in *Anopheles coluzzii*: the effects of spiracle size and cuticular hydrocarbons. *Journal of Experimental*  
289 *Biology*, **219**, 1675–1688.

290 Chapman, J.W., Bell, J.R., Burgin, L.E., Reynolds, D.R., Pettersson, L.B., Hill, J.K., *et al.* (2012) Seasonal  
291 migration to high latitudes results in major reproductive benefits in an insect. *Proceedings of the*  
292 *National Academy of Sciences*, **109**, 14924–14929.

293 Clements, A.N. (1992) *The Biology of Mosquitoes*. Chapman & Hall, London.

294 Cockbain, A.J. (1961) Viability and Fecundity of Alate Alienicolae of *Aphis Fabae* Scop. After Flights to  
295 Exhaustion. *Journal of Experimental Biology*, **38**.

296 Copernicus Climate Change Service. (2018) ERA5. (C3S) (2017): ERA5: Fifth generation of ECMWF  
297 atmospheric reanalyses of the global climate . Copernicus Climate Change Service Climate Data Store  
298 (CDS) [WWW Document]. URL <https://cds.climate.copernicus.eu/cdsapp#!/home> [accessed on 2018].

299 Dao, A., Yaro, A.S., Diallo, M., Timbine, S., Huestis, D.L., Kassogue, Y., *et al.* (2014) Signatures of  
300 aestivation and migration in Sahelian malaria mosquito populations. *Nature*, **516**, 387–390.

301 Drake, V.A. & Reynolds, D.R. (2012) *Radar entomology*: observing insect flight and migration. CABI  
302 International.

303 Faiman, R., Yaro, A.S., Diallo, M., Dao, A., Djibril, S., Sanogo, Z.L., *et al.* (2020) Quantifying flight aptitude  
304 variation in wild *A. gambiae* s.l. in order to identify long-distance migrants. *bioRxiv*, 2020.03.03.975243.

305 Fanello, C., Santolamazza, F. & Torre, A. della. (2002) Simultaneous identification of species and  
306 molecular forms of the *Anopheles gambiae* complex by PCR-RFLP. *Med Vet Entomol*, **16**, 461–464.

307 Florio, J., Verú, L., Dao, A., Yaro, A., Diallo, M., Sanogo, Z., *et al.* (2020) Massive windborne migration of  
308 Sahelian insects: Diversity, seasonality, altitude, and direction. *bioRxiv*, 2020.02.28.960195.

309 Garrett-Jones, C. (1962) The possibility of active long-distance migrations by *Anopheles pharoensis*  
310 Theobald. *Bulletin of the World Health Organization*, **27**, 299–302.

311 Gillies, M.T. & Wilkes, T.J. (1976) The vertical distribution of some West African mosquitoes (Diptera,  
312 Culicidae) over open farmland in a freshwater area of the Gambia. *Bulletin of Entomological Research*,  
313 **66**, 5.

314 Glick, P.A. (1939) *The distribution of insects, spiders, and mites in the air*. United States Department of  
315 Agriculture, Technical Bulletin. Washington D.C.

316 Huestis, D.L., Dao, A., Diallo, M., Sanogo, Z.L., Samake, D., Yaro, A.S., *et al.* (2019) Windborne long-  
317 distance migration of malaria mosquitoes in the Sahel. *Nature*, **574**, 404–408.

318 Huestis, D.L. & Lehmann, T. (2014) Ecophysiology of *Anopheles gambiae* s.l.: Persistence in the Sahel.  
319 *Infection, Genetics and Evolution*, **28**, 648–661.

320 Johansen, C.A., Farrow, R.A., Morrisen, A., Foley, P., Bellis, G., Hurk, A.F. Van Den, *et al.* (2003) Collection

- 321 of wind-borne haematophagous insects in the Torres Strait, Australia. *Med Vet Entomol*, **17**, 102–109.
- 322 Johnson, C.G. (1969) *Migration and dispersal of insects by flight*. Methuen, London, UK.
- 323 Johnson, C.G., Taylor, L.R. & Southwood, T.R.E. (1962) High Altitude Migration of *Oscinella frit* L.  
324 (Diptera: Chloropidae). *The Journal of Animal Ecology*, **31**, 373.
- 325 Kaufmann, C. & Briegel, H. (2004) Flight performance of the malaria vectors *Anopheles gambiae* and  
326 *Anopheles atroparvus*. *Journal of vector ecology*, **29**, 140–153.
- 327 Lehmann, T., Dao, A., Yaro, A.S.S.A.S., Adamou, A., Kassogue, Y., Diallo, M., *et al.* (2010) Aestivation of  
328 the African Malaria Mosquito, *Anopheles gambiae* in the Sahel. *American Journal of Tropical Medicine*  
329 *and Hygiene*, **83**, 601–606.
- 330 Lehmann, T. & Diabate, A. (2008) The molecular forms of *Anopheles gambiae*: A phenotypic perspective.  
331 *Infection, Genetics and Evolution*, **8**, 737–746.
- 332 Lemasson, J.J., Fontenille, D., Lochouarn, L., Dia, I., Simard, F., Ba, K., *et al.* (1997) Comparison of  
333 behavior and vector efficiency of *Anopheles gambiae* and *An. arabiensis* (Diptera: Culicidae) in Barkedji,  
334 a Sahelian area of Senegal. *J. Med. Entomol.*, **34**, 396–403.
- 335 Mcanelly, M.L. & Rankin, M.A. (1986) Migration in the grasshopper *Melanoplus sanguinipes* (Fab.). II.  
336 Interactions between flight and reproduction. *The Biological Bulletin*, **170**, 378–392.
- 337 Miao, J., Wu, Y.-Q., Gong, Z.-J., He, Y.-Z., Duan, Y. & Jiang, Y.-L. (2013) Long-Distance Wind-Borne  
338 Dispersal of *Sitodiplosis mosellana* Géhin (Diptera: Cecidomyiidae) in Northern China. *Journal of Insect*  
339 *Behavior*, **26**, 120–129.
- 340 Ming, J., Hua, J., Riley, J.R., Reynolds, D.R., Smith, A.D., Wange, R.-L., *et al.* (1993) Autumn southward  
341 “return” migration of the mosquito *Culex tritaeniorhynchus* in China. *Medical and Veterinary*  
342 *Entomology*, **7**, 323–327.
- 343 Pedgley, D.E., Reynolds, D.R. & Tatchell, G.M. (1995) Long-range insect migration in relation to climate  
344 and weather: Africa and Europe. In *Insect Migration: Tracking resources through space and time* (ed. by  
345 Drake, V.A. & Gatehouse, A.G.). Cambridge University Press, New York, pp. 3–30.
- 346 Rainey, R.C. (1973) Airborne pests and the atmospheric environment. *Weather*, **28**, 224–239.
- 347 Reynolds, D.R., Chapman, J.W. & Harrington, R. (2006) The migration of insect vectors of plant and  
348 animal viruses. In *Plant Virus Epidemiology* (ed. by Thresh, J.M.). pp. 453–517.
- 349 Reynolds, D.R., Smith, A.D., Mukhopadhyay, S.S., Chowdhury, A.K., De, B.K., Nath, P.S., *et al.* (1996)  
350 Atmospheric transport of mosquitoes in northeast India. *Medical & Veterinary Entomology*, **10**, 185–  
351 186.
- 352 Rosenberg, L.J. & Magor, J.I. (1987) Predicting Windborne Displacements of the Brown Planthopper,  
353 *Nilaparvata lugens* from Synoptic Weather Data. 1. Long-Distance Displacements in the North-East  
354 Monsoon. *The Journal of Animal Ecology*, **56**, 39.
- 355 Sanders, C.J., Selby, R., Carpenter, S. & Reynolds, D.R. (2011) High-altitude flight of *Culicoides* biting  
356 midges. *The Veterinary record*, **169**, 208.
- 357 SAS Inc., I. (2012) SAS for Windows Version 9.4.
- 358 Sellers, R.F. (1980) Weather, host and vector—their interplay in the spread of insect-borne animal virus

- 359 diseases. *The Journal of hygiene*, **85**, 65–102.
- 360 Service, M.W. (1997) Mosquito (Diptera: Culicidae) dispersal - the long and the short of it. *Journal of*  
361 *Medical Entomology*, **34**, 579–588.
- 362 Snow, W.E. & Wilkes, T.J. (1972) The vertical distribution, and age, of mosquito populations in West  
363 African savanna. *Transactions of the Royal Society of Tropical Medicine and Hygiene*, **66**, 536–7.
- 364 Snow, W.F. (1982) Further observations on the vertical distribution of flying mosquitoes (Diptera:  
365 Culicidae) in West African savanna. *Bulletin of Entomological*.
- 366 Taylor, L.R. (1960) Mortality and viability of insect migrants high in the air. *Nature*, **186**, 410.
- 367 Toure, Y.T., Traore, S.F., Sankare, O., Sow, M.Y., Coulibaly, A., Esposito, F., *et al.* (1996) Perennial  
368 transmission of malaria by the *Anopheles gambiae* complex in a north Sudan Savanna area of Mali.  
369 *Med Vet Entomol*, **10**, 197–199.
- 370 Wotton, K.R., Gao, B., Menz, M.H.M., Morris, R.K.A., Ball, S.G., Lim, K.S., *et al.* (2019) Mass Seasonal  
371 Migrations of Hoverflies Provide Extensive Pollination and Crop Protection Services. *Current Biology*, **29**,  
372 2167–2173.e5.
- 373 Yaro, A.S., Traore, A.I., Huestis, D.L., Adamou, A., Timbine, S., Kassogue, Y., *et al.* (2012) Dry season  
374 reproductive depression of *Anopheles gambiae* in the Sahel. *Journal of Insect Physiology*, **58**, 1050–1059.
- 375
- 376 **Acknowledgements:** We are grateful to the residents of Thierola for their permission to work near their  
377 homes and for their wonderful assistance and hospitality. We thank Drs. Sekou F Traore and Thomas  
378 Wellems, and Ms. Margie Sullivan, and Mr. Samuel Moretz (National Institutes of Health, USA) for  
379 logistical support. Dr. Malla Rao (NIH) has highlighted the importance of the question addressed by this  
380 study to the vector biology community in a discussion with Dr. Yan Guiyun (University of California,  
381 Irvine). We thank Drs. Don Reynolds (University of Greenwich, UK) and Jason Chapman (University of  
382 Exeter, UK and Nanjing Agricultural University, China) for reading earlier versions of this manuscript and  
383 providing us with helpful suggestions.
- 384 **Funding:** This study was supported by the Division of Intramural Research, National Institute of Allergy  
385 and Infectious Diseases, National Institutes of Health.
- 386 **Authors Contributions:** This project was designed by TL, AD, ASY, and RF. Field methods and operations,  
387 data management, and specimens processing was performed by ZLS, ASY, MD, DS, and OY. Laboratory  
388 processing and identification of morphotypes was done by ZLS, MD, DS, OY, ASY, and AD. Data analysis  
389 were carried out by TL with inputs from all authors, especially BJK, RF, ZLS and ASY. BJK has written  
390 scripts to obtain ERA5 data and provided these data. The manuscript was drafted by TL and ZLS and  
391 revised by all authors. Throughout the project, all authors have contributed key ingredients and ideas  
392 that have shaped the work and the final paper.
- 393 **Competing Interests:** All authors declare no competing financial interests.
- 394 **Data availability:** The dataset and SAS code used to analyze the data are available upon request from the  
395 corresponding author.
